# Supplementary material for: A Honeycomb-like Ammonium-Ion Fiber Battery with High and Stable Performance for Wearable Energy Storage
Source: MDPI journal article supplement (doi:10.3390/polym14194149), 2022-10-03
Supplement: s1 [file s1]

## Supporting Information

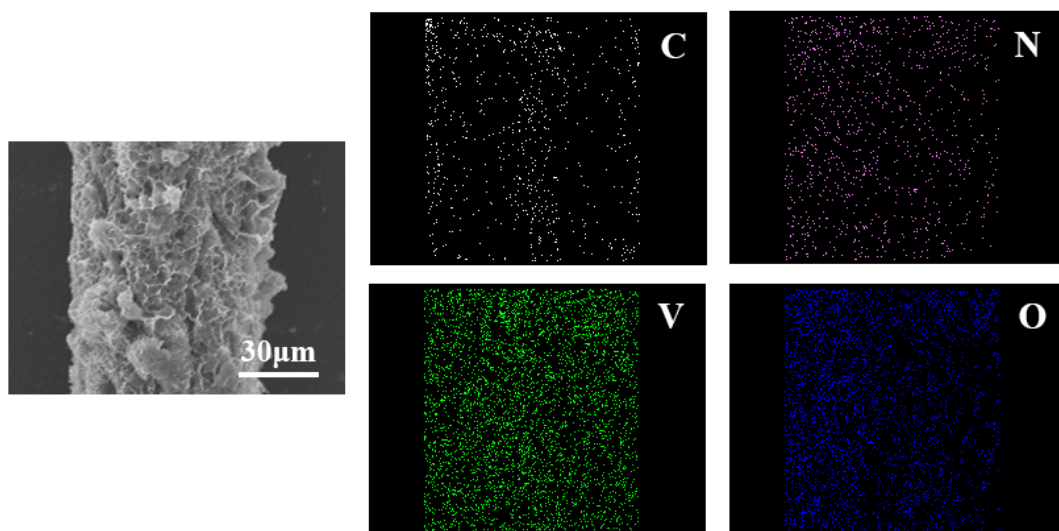

Figure S1: SEM images of  $\text{NH}_4\text{V}_4\text{O}_{10}$ @CNT fiber and EDS mapping of C, N, V, O, respectively

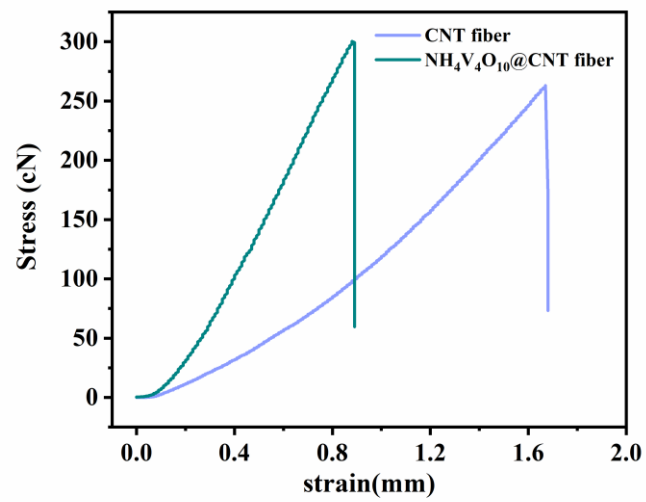

Figure S2: the stress-strain curve of CNT and  $\text{NH}_4\text{V}_4\text{O}_{10}$ @CNT

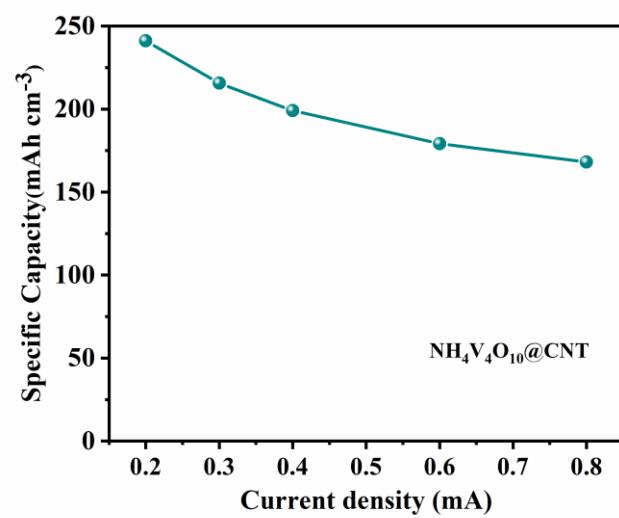

Figure S3: the specific capacity of  $\text{NH}_4\text{V}_4\text{O}_{10}@\text{CNT}$  electrode at different current density

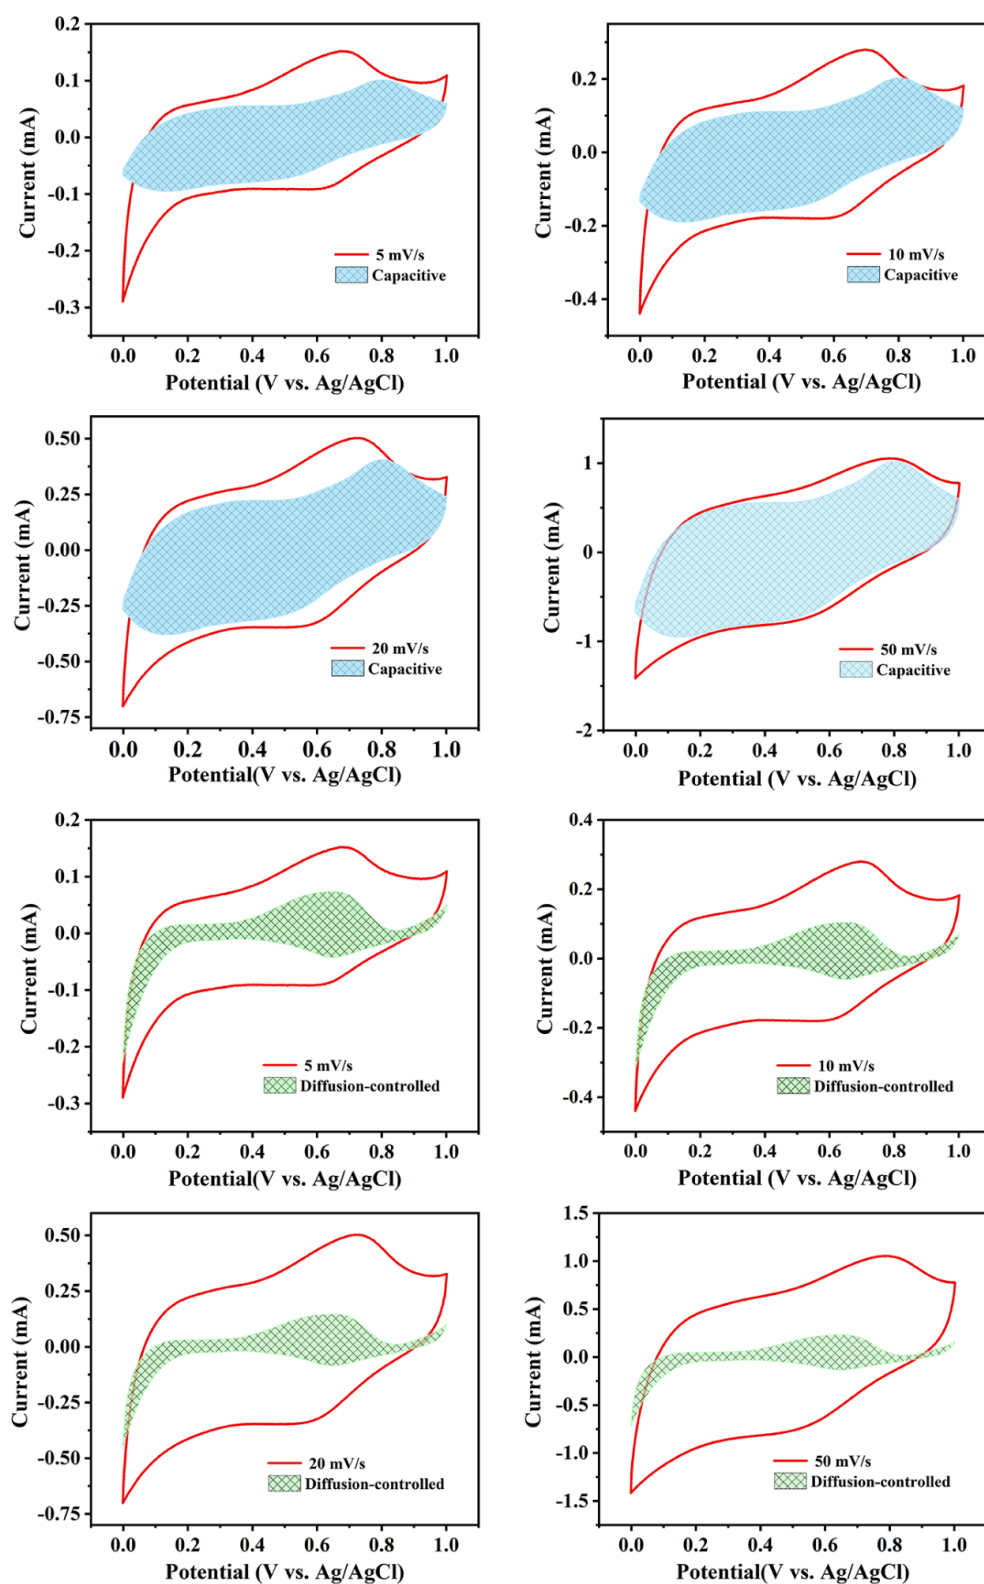

Figure S4: CV curves with the capacitive and pseudocapacitive fraction shown by the shaded area at different scan rate of  $\text{NH}_4\text{V}_4\text{O}_{10}@\text{CNT}$  fiber battery

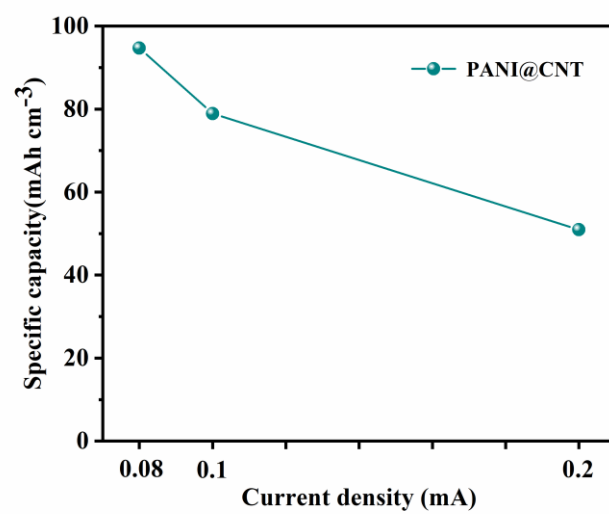

Figure S5: the specific capacity of PANI@CNT electrode at different current density

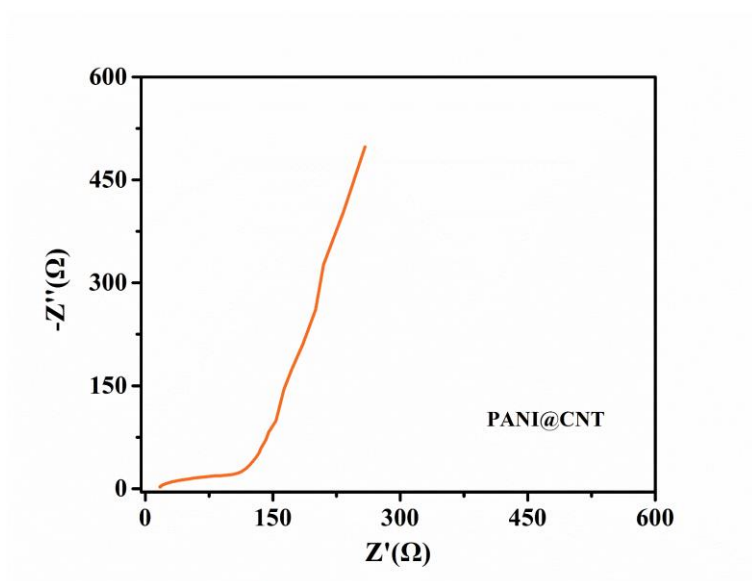

Figure S6: EIS of PANI@CNT fiber

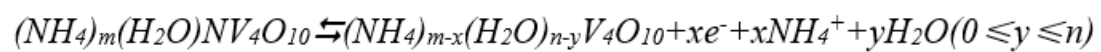

Figure S7: The overall reactions in the charge and discharge processes of the full cell

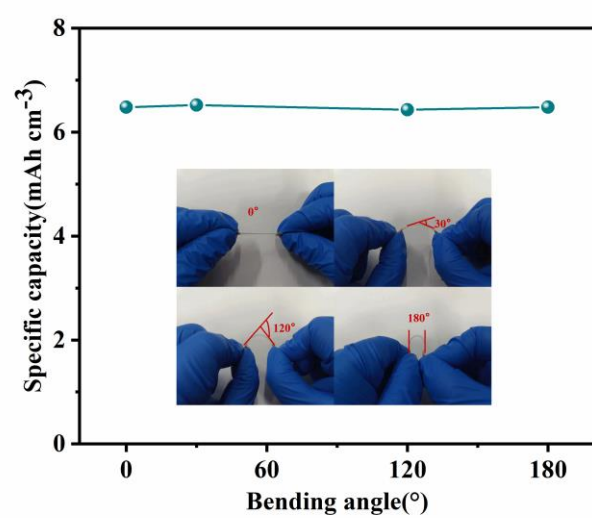

Figure S8: the specific capacity of the full cell under different bending states



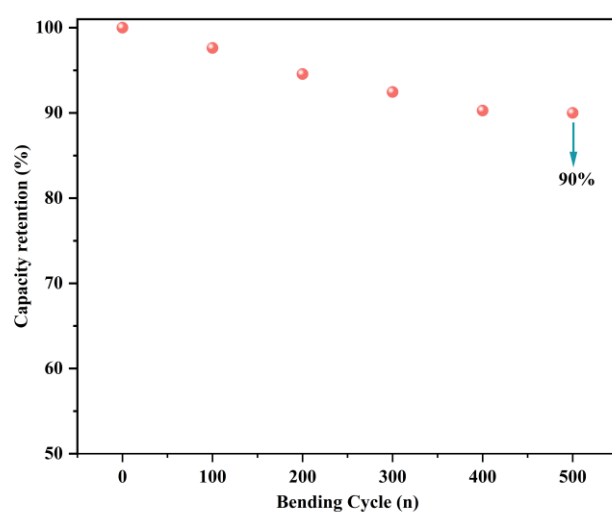

Figure S9: the capacity retention of the full cell under 500 bending cycles

Table S1: Compared to previous work on electrochemical performance of fiber batteries

| Cathode /anode                                      | Battery Types | Capacity                    | Capacity retention/cycles/<br>current density | Ref. |
|-----------------------------------------------------|---------------|-----------------------------|-----------------------------------------------|------|
| NH <sub>4</sub> V <sub>4</sub> O <sub>10</sub> @CNT | Half cell     | 241.06 mAh cm <sup>-3</sup> | N/A                                           | Our  |
| PANI                                                | Full cell     | 6.86 mAh cm <sup>-3</sup>   | 72.1%/1000/0.5 mA                             | work |
| Ni-NiO                                              | Full cell     | 237.8 uAh cm <sup>-3</sup>  | 96.6%/10000/3.7                               | [33] |
| Zn                                                  |               |                             | A/g                                           |      |
| CC-ZnO@C@Zn                                         | Full cell     | 3 mAh cm <sup>-3</sup>      | 82%/1600/250 mA                               | [34] |
| CC-CCH@CMO                                          |               |                             | cm <sup>-3</sup>                              |      |
| Co <sub>3</sub> O <sub>4</sub> /N-rGO               | Full cell     | 0.5 mAh cm <sup>-3</sup>    | NA                                            | [35] |
| Zn                                                  |               |                             |                                               |      |
| Co/Co-N-C                                           | Full cell     | 0.17 mAh cm <sup>-3</sup>   | NA                                            | [36] |
| Zn                                                  |               |                             |                                               |      |
